# Supplementary material
Source: publisher figshare collection journal article supplement (https://acs.figshare.com/ndownloader/files/8387957)
Supplement: Supplementary file 1 [file 8387957]

# Nanomanipulating and tuning ultraviolet ZnO-nanowire-induced photonic crystal nanocavities

*Sylvain Sergent,<sup>1,2,\*</sup> Masato Takiguchi,<sup>1,2</sup>, Tai Tsuchizawa,<sup>1,3</sup> Atsushi Yokoo,<sup>1,2</sup> Hideaki Taniyama,<sup>1,2</sup> Eichi Kuramochi,<sup>1,2</sup> and Masaya Notomi<sup>1,2</sup>.*

Nanophotonics Center, NTT Corp., 3-1, Morinosato Wakamiya, Atsugi, Kanagawa 243-0198, Japan

NTT Basic Research Laboratories, NTT Corp., 3-1, Morinosato Wakamiya, Atsugi, Kanagawa 243-0198, Japan

NTT Device Technology Laboratory, NTT Corp., 3-1, Morinosato Wakamiya, Atsugi, Kanagawa 243-0198, Japan

## **1. Absence of intrinsic resonance in ZnO nanowires**

To confirm the absence of Fabry-Pérot resonances in the nanowires (NWs) investigated in this work, we perform 3D-FDTD calculations of ZnO NWs with  $\delta = 90\text{nm}$ , the largest diameter used in this work to fabricate ZnO-NW-induced photonic crystal (PhC) nanocavities. Three configurations are considered: a bare NW, a NW sitting on top of an unpatterned SiN slab and a NW positioned inside a groove with no surrounding PhC. The broadband light source is spectrally centered at 350 nm and the magnetic field component  $|H_y|$  is calculated at the center

of the NW or at the SiN/NW interface. The calculated amplitudes of the magnetic field component  $|H_y|$  shows that optical modes are not allowed in the range of the ZnO NW emission and the NW-induced PhC nanocavity modes investigated in our work (Figure S1). The result holds for the magnetic field calculated both at the center of the NW and at the lower SiN/NW interface, suggesting that hybrid modes localized at the SiN/NW interface are not present in the structure. This result is confirmed by the microphotoluminescence ( $\mu$ PL) spectra of NWs positioned on a SiN slab and in a groove that do not show any intrinsic resonance.

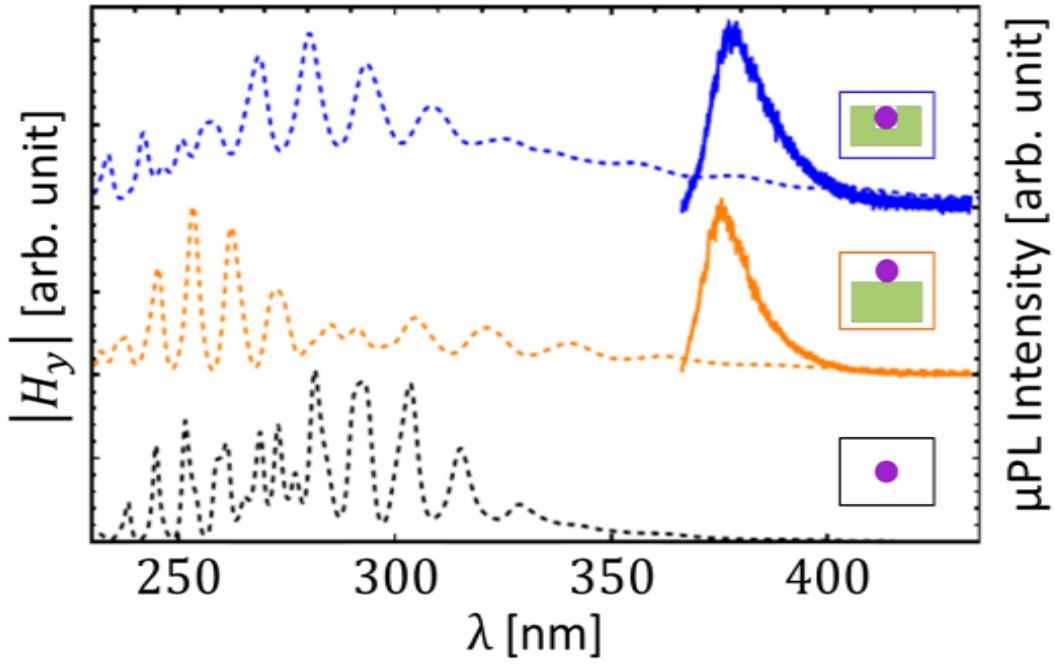

**Figure S1.** Magnetic field component  $|H_y|$  as calculated by 3D-FDTD for ZnO NWs with  $\delta = 90\text{nm}$ , (dashed lines) and  $\mu$ PL emission spectra of single ZnO-NWs (solid lines). The black, yellow and blue lines correspond to three configurations schematically represented in insets: respectively a bare NW in vacuum, a NW sitting on top of an unpatterned SiN slab and a NW positioned in a groove without any surrounding PhC.

## 2. Fabrication imperfections and optical losses

We address the impact of fabrication imperfections on the quality factor of ZnO-NW-induced PhC nanocavities: misalignment  $\delta_x$  along the x axis between the groove and the center of the PhC waveguide, mismatch  $\delta_y$  between the groove depth  $d$  and the diameter of the NW  $\delta$ , misalignment  $\delta_{x,NW}$  along the x axis between the NW and the center of the groove, presence of defects on the NW wall.

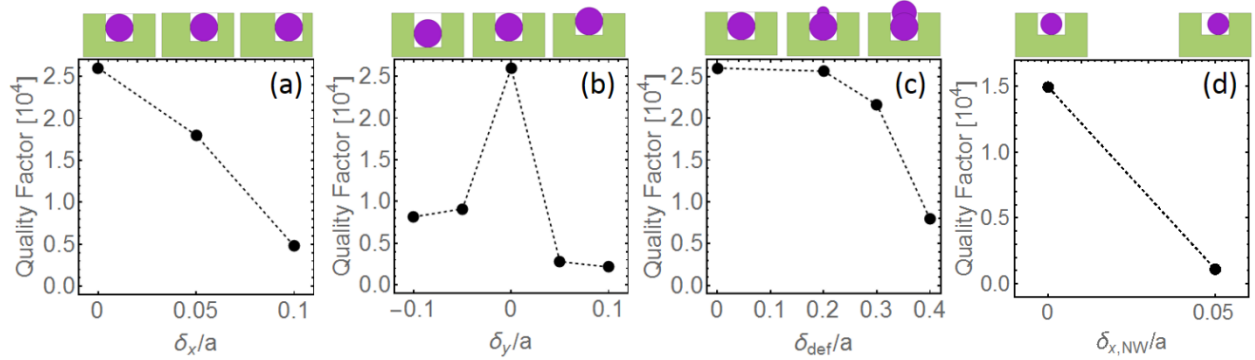

**Figure S2.** (a) Quality factor as a function of  $\delta_x$ . (b) Quality factor as a function of  $\delta_y$ . (c) Quality factor as a function of  $\delta_{def}$ , the diameter of spherical defects positioned on the NW walls. (d) Quality factor as a function of  $\delta_{x,NW}$  for  $\delta = d = 0.35a$ ,  $w = 0.45a$ . Unless specified otherwise, all the design parameters used in these calculations are identical to the one described in the main text. In each panel, cross-sections of the cavity core are shown for various data points.
